# Supplementary material for: Evaluation of MIP-OES as a detector in DLLME procedures: application to Cd determination in water samples
Source: Royal Society of Chemistry journal article supplement (doi:10.1039/d0ja00113a), 2020-01-01

## Electronic supplementary information

**Table S1**

Emission wavelengths employed in this work

|                 | Element                     | Type | Wavelength<br>(nm)        | Element | Type | Wavelength<br>(nm)         |
|-----------------|-----------------------------|------|---------------------------|---------|------|----------------------------|
| <b>Analytes</b> | Ag                          | I    | 328.068                   | Mn      | I    | 403.076                    |
|                 | Al                          | I    | 396.152                   | Mo      | I    | 379.825                    |
|                 | B                           | I    | 249.772                   | Na      | I    | 588.995                    |
|                 | Cd                          | I    | 228.802                   | Ni      | I    | 352.454                    |
|                 | Co                          | I    | 340.512                   | Pb      | I    | 405.781                    |
|                 | Cr                          | I    | 425.433                   | Sn      | I    | 317.505                    |
|                 | Cu                          | I    | 324.754                   | Sr      | II   | 407.721                    |
|                 | Fe                          | I    | 371.993                   | Ti      | II   | 334.941                    |
|                 | K                           | I    | 766.491                   | Tl      | I    | 535.046                    |
|                 | Li                          | I    | 670.784                   | V       | I    | 309.311                    |
|                 | Mg                          | II   | 280.270                   | Y       | II   | 371.029                    |
|                 | Mg                          | I    | 285.213                   | Zn      | I    | 213.857                    |
|                 | <b>Molecular band</b>       |      |                           |         |      |                            |
|                 | CN                          | -    | 388.340<br>(Cr I 388.327) | CH      | -    | 431.420<br>(Sc II 431.408) |
|                 | C <sub>2</sub>              | -    | 473.700<br>(Fe I 473.677) | OH      | -    | 308.970<br>(Tb II 308.958) |
|                 | N <sub>2</sub> <sup>+</sup> | -    | 391.439<br>(Nb I 391.470) |         |      |                            |

**Table S2.** Central composite design for Cd extraction with DLLME operating chloroform as extractant.

| Variables                                | Levels |     |     |     |     |
|------------------------------------------|--------|-----|-----|-----|-----|
|                                          | ++     | +   | 0   | -   | --  |
| NaCl concentration (w v <sup>-1</sup> %) | 8      | 6   | 4   | 2   | 0   |
| DDTP concentration (w w <sup>-1</sup> %) | 3.3    | 2.5 | 2   | 0.9 | 0.1 |
| Mass of disperser solvent (mg)           | 600    | 500 | 400 | 300 | 200 |
| Mass of extraction solvent (mg)          | 475    | 400 | 325 | 250 | 175 |

**Table S3.** Cadmium signal response for a CCD design operating DLLME with chloroform.  $Q_g$ : 0.3 L min<sup>-1</sup>; analyte concentration: 0.5 mg L<sup>-1</sup>.

| NaCl<br>(% w w <sup>-1</sup> ) | DDTP<br>(% w w <sup>-1</sup> ) | Ethanol<br>(mL) | Chloroform<br>(mL) | Integrated signal<br>(counts) · 10 <sup>3</sup> |
|--------------------------------|--------------------------------|-----------------|--------------------|-------------------------------------------------|
| 2                              | 2.5                            | 500             | 400                | 1440±30                                         |
| 2                              | 2.5                            | 300             | 250                | 1200±130                                        |
| 2                              | 2.5                            | 300             | 400                | 630±60                                          |
| 8                              | 1.7                            | 400             | 325                | 2600±140                                        |
| 6                              | 0.9                            | 300             | 250                | 1800±120                                        |
| 4                              | 1.7                            | 400             | 325                | 1380±8                                          |
| 6                              | 2.5                            | 300             | 400                | 1050±60                                         |
| 4                              | 1.7                            | 200             | 325                | 900±40                                          |
| 4                              | 1.7                            | 600             | 325                | 2300±190                                        |
| 6                              | 2.5                            | 500             | 400                | 1430±20                                         |
| 4                              | 1.7                            | 400             | 475                | 1000±50                                         |
| 6                              | 0.9                            | 500             | 400                | 1640±30                                         |
| 6                              | 2.5                            | 500             | 250                | 2600±170                                        |
| 2                              | 0.9                            | 300             | 400                | 900±70                                          |
| 4                              | 1.7                            | 400             | 175                | 1340±20                                         |
| 2                              | 0.9                            | 300             | 250                | 2025±7                                          |
| 2                              | 2.5                            | 500             | 250                | 2900±200                                        |
| 4                              | 3.3                            | 400             | 325                | 1600±170                                        |
| 6                              | 0.9                            | 300             | 400                | 950±70                                          |
| 4                              | 1.7                            | 400             | 325                | 1300±170                                        |
| 2                              | 0.9                            | 500             | 250                | 3000±400                                        |
| 4                              | 0.1                            | 400             | 325                | 1230±91                                         |
| 0                              | 1.7                            | 400             | 325                | 1900±100                                        |
| 2                              | 0.9                            | 500             | 400                | 1370±80                                         |
| 6                              | 2.5                            | 300             | 250                | 2400±140                                        |
| 6                              | 0.9                            | 500             | 250                | 2100±180                                        |

**Table S4.** Central composite design for Cd extraction with DLLME operating the supramolecular solvent as extractant.

| Variables                                | Levels |     |     |     |     |
|------------------------------------------|--------|-----|-----|-----|-----|
|                                          | ++     | +   | 0   | -   | --  |
| NaCl concentration (w v <sup>-1</sup> %) | 4      | 3   | 2   | 1   | 0   |
| DDTP concentration (w w <sup>-1</sup> %) | 3.3    | 2.5 | 1.7 | 0.9 | 0.1 |
| Mass of THF (mg)                         | 750    | 600 | 450 | 300 | 150 |
| Mass of 1-decanol (mg)                   | 240    | 200 | 160 | 120 | 80  |

**Table S5.** Cadmium signal response for a CCD design operating DLLME with the supramolecular solvent.  $Q_g$ : 0.3 L min<sup>-1</sup>; analyte concentration: 0.5 mg L<sup>-1</sup>.

| NaCl<br>(% w w <sup>-1</sup> ) | DDTP<br>(% w w <sup>-1</sup> ) | THF<br>(mL) | 1-decanol<br>(mL) | Integrated signal<br>(counts) · 10 <sup>3</sup> |
|--------------------------------|--------------------------------|-------------|-------------------|-------------------------------------------------|
| 1                              | 0.9                            | 600         | 200               | 375±2                                           |
| 2                              | 1.7                            | 150         | 160               | 482±7                                           |
| 3                              | 0.9                            | 300         | 120               | 570±15                                          |
| 2                              | 1.7                            | 450         | 240               | 365.7±0.5                                       |
| 1                              | 0.9                            | 300         | 200               | 406±1.4                                         |
| 3                              | 2.5                            | 600         | 200               | 400±19                                          |
| 3                              | 2.5                            | 300         | 200               | 100±2                                           |
| 3                              | 2.5                            | 300         | 120               | 500±100                                         |
| 2                              | 3.3                            | 450         | 160               | 141±1.5                                         |
| 1                              | 2.5                            | 300         | 120               | 530±40                                          |
| 2                              | 1.7                            | 450         | 80                | 720±10                                          |
| 4                              | 1.7                            | 450         | 160               | 296±9                                           |
| 3                              | 0.9                            | 300         | 200               | 360±30                                          |
| 3                              | 0.9                            | 600         | 200               | 125±4                                           |
| 2                              | 1.7                            | 750         | 160               | 440±20                                          |
| 3                              | 0.9                            | 600         | 120               | 360±60                                          |
| 2                              | 0.1                            | 450         | 160               | 170±12                                          |
| 1                              | 0.9                            | 300         | 120               | 327±6                                           |
| 3                              | 2.5                            | 600         | 120               | 250±11                                          |
| 1                              | 0.9                            | 600         | 120               | 300±40                                          |
| 1                              | 2.5                            | 600         | 120               | 470±50                                          |
| 1                              | 2.5                            | 300         | 200               | 380±13                                          |
| 2                              | 1.7                            | 450         | 160               | 244±7                                           |
| 0                              | 1.7                            | 450         | 160               | 190±30                                          |
| 2                              | 1.7                            | 450         | 160               | 240±20                                          |
| 1                              | 2.5                            | 600         | 200               | 450±13                                          |

**Fig. S1.** Emission spectra for  $N_2^+$  molecular band (391.439 nm) operating (●) 1.0 w w<sup>-1</sup> nitric acid, (□) the supramolecular solvent and (○) chloroform.  $Q_g$  0.3 L min<sup>-1</sup>.

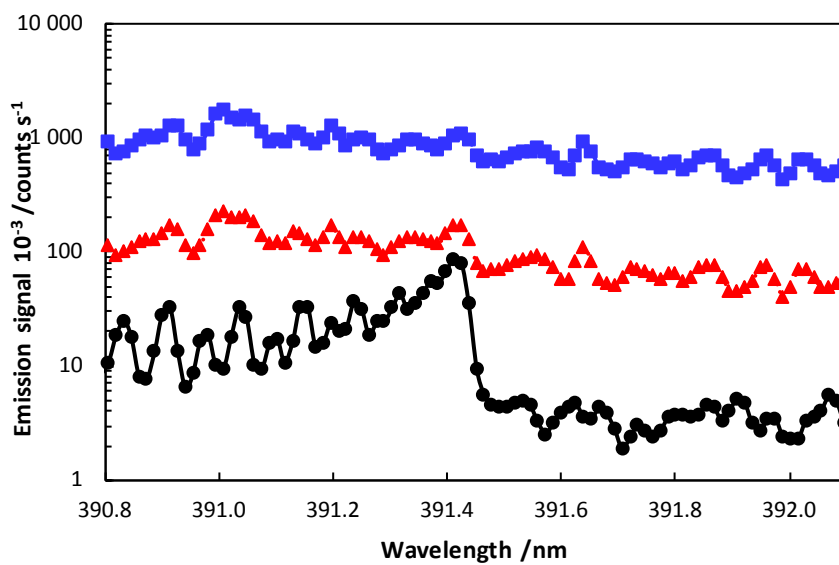

**Fig. S2.** Pareto charts obtained in the optimization study of the main variables affecting Cd extraction with DLLME for (A) chloroform and (B) the supramolecular solvent. (□) positive effect; (■) negative effect.

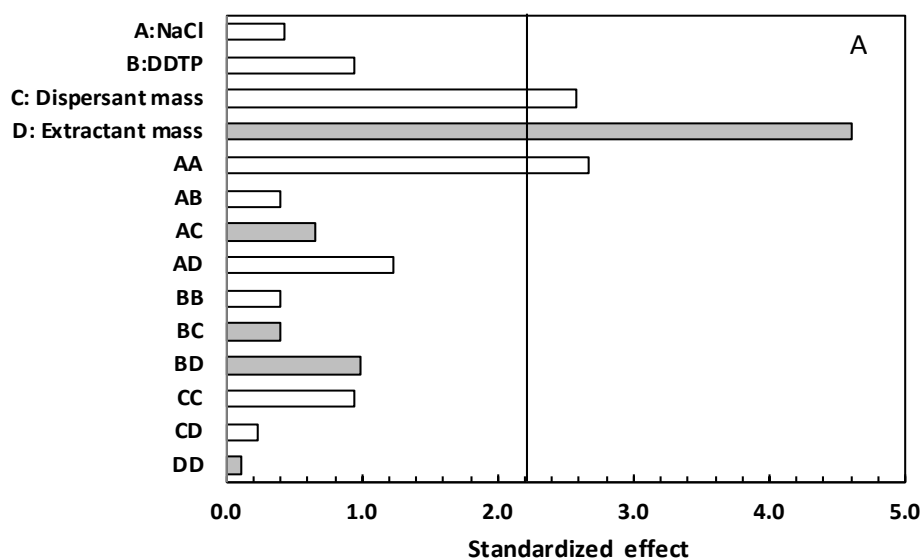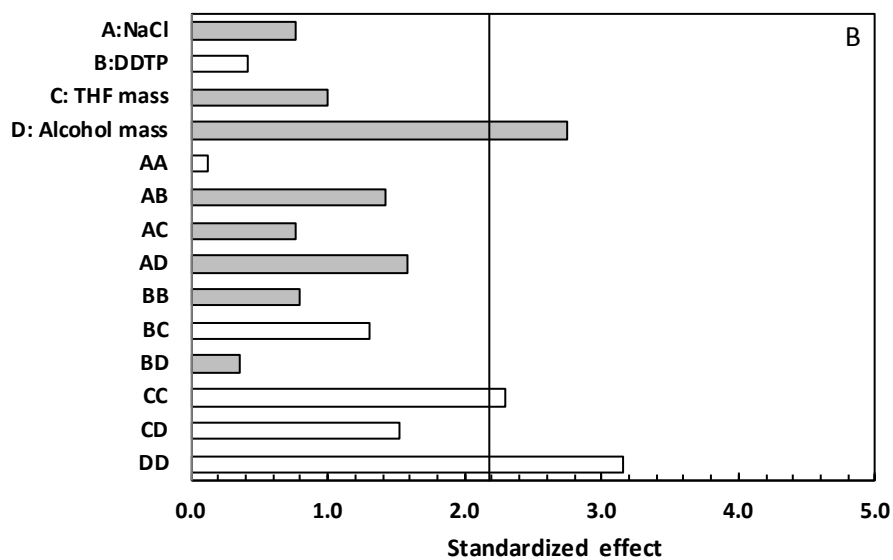

Supplement: d0ja00113a1.pdf [file d0ja00113a1.pdf]
